# Supplementary material for: microRNA-569 inhibits tumor metastasis in pancreatic cancer by directly targeting NUSAP1
Source: publisher site journal article supplement (doi:10.18632/aging.204035), 2022-04-28
Supplement: Supplementary file [file aging-v14i8-204035-supplementary-material-SD1.pdf]

**SUPPLEMENTARY FIGURE**

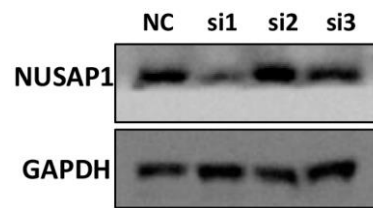

**Supplementary Figure 1. Western blot of NUSAP1 knockdown.**
